# Supplementary material for: Afforestation-Induced Shifts in Soil Bacterial Diversity and Community Structure in the Saihanba Region
Source: MDPI journal article supplement (doi:10.3390/microorganisms12030479), 2024-02-27
Supplement: s1 [file s1]

## Supplementary Materials

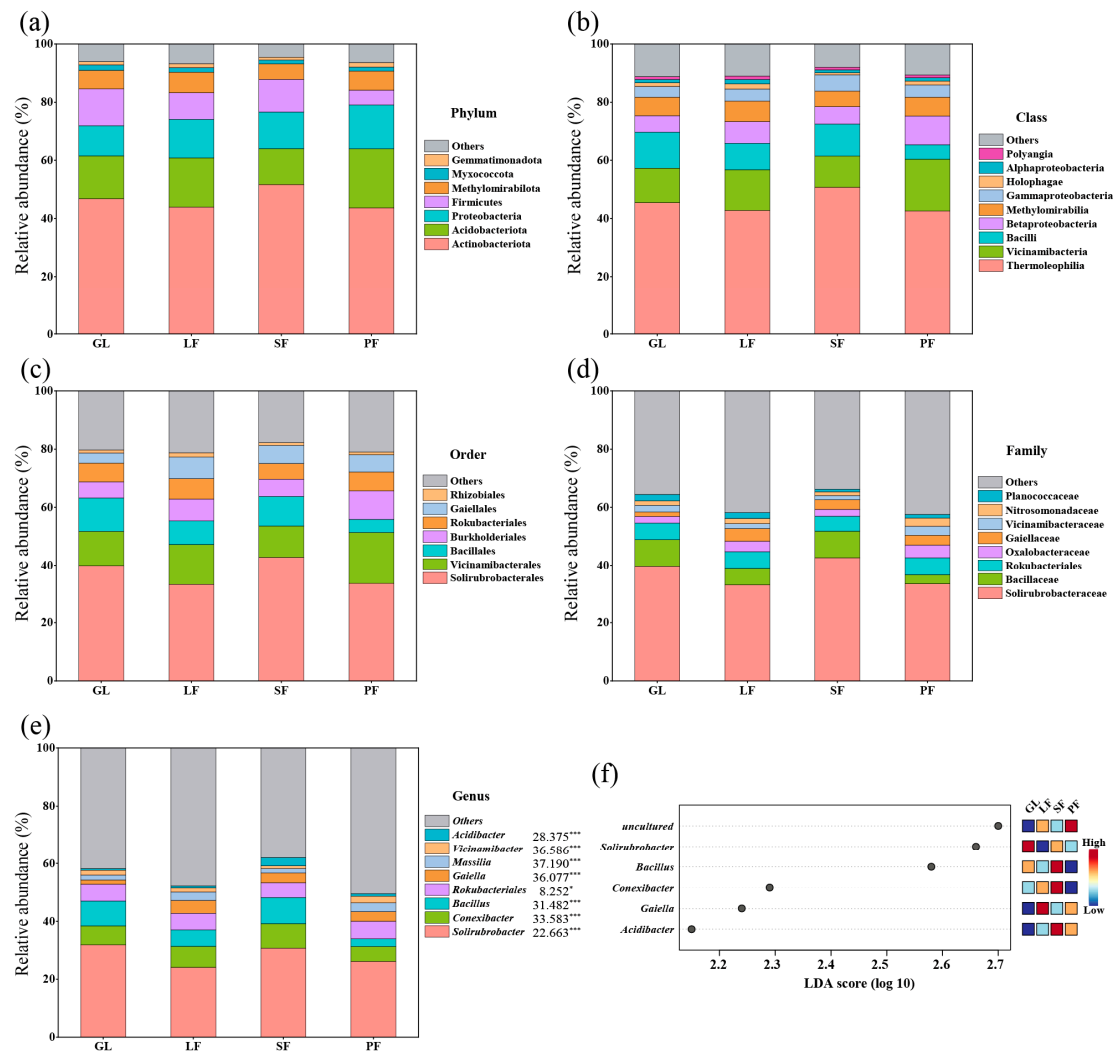

**Figure S1.** Community composition and differential analysis of soil bacteria in the Saihanba region. (a-e) Relative abundance of dominant bacteria from phyla to genera among four vegetation types. (f) LefSe analysis of genera between vegetation types (LDA significance threshold > 2.0). \* $p < 0.05$ , \*\*\* $p < 0.001$ .

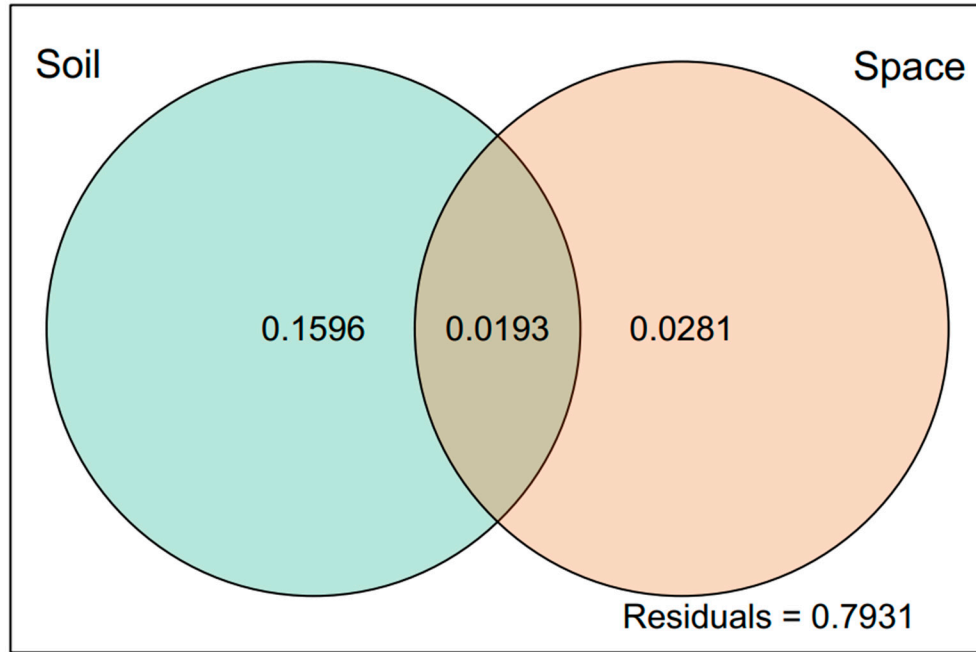

**Figure S2.** The relative importance of geographical distance and soil properties in shaping bacterial community compositions.

**Table S1.** Abundance and Kruskal–Wallis tests of bacterial phyla in four vegetation types in the Saihanba region (Please refer to the excel file).

**Table S2.** Abundance and Kruskal–Wallis tests of bacterial classes in four vegetation types in the Saihanba region (Please refer to the excel file).

**Table S3.** Abundance and Kruskal–Wallis tests of bacterial orders in four vegetation types in the Saihanba region (Please refer to the excel file).

**Table S4.** Abundance and Kruskal–Wallis tests of bacterial families in four vegetation types in the Saihanba region (Please refer to the excel file).

**Table S5.** Abundance and Kruskal–Wallis tests of bacterial genera in four vegetation types in the Saihanba region (Please refer to the excel file).
