# Supplementary material for: Afforestation-Induced Shifts in Soil Bacterial Diversity and Community Structure in the Saihanba Region
Source: Microorganisms. 2024 Feb 27;12(3):479. doi: 10.3390/microorganisms12030479 (PMC10974129; doi:10.3390/microorganisms12030479)
Supplement: Supplementary file 1 [file microorganisms-12-00479-s001.zip › Supplementary materials (Tables S1-S5).xlsx]

## Sheet: Table S1
Table S1. Abundance and Kruskal‒Wallis tests of bacterial phyla in four vegetation types in the Saihanba region.
Sample Label	Vegetation	Gemmatimonadota	Myxococcota	Methylomirabilota	Firmicutes	Proteobacteria	Acidobacteriota	Actinobacteriota	Others
C1	GL	129	246	632	1050	1296	1775	6088	576
C10	GL	149	162	586	2970	1034	1658	4593	640
C11	GL	107	134	286	6100	974	1279	2302	610
C12	GL	128	205	986	405	1278	1774	6192	824
C13	GL	162	227	1059	1405	1285	1754	5132	768
C14	GL	171	248	561	630	1387	2192	5837	766
C15	GL	160	314	634	621	1090	1890	6437	646
C2	GL	106	219	823	1656	1079	1676	5514	719
C3	GL	85	223	557	2326	1145	1621	5152	683
C4	GL	105	229	1038	555	1449	1841	5750	825
C5	GL	149	209	1034	749	1191	1545	6096	819
C6	GL	130	232	694	801	1234	1659	6449	593
C7	GL	98	311	753	1007	1247	1853	5764	759
C8	GL	107	280	826	789	1227	1654	6188	721
C9	GL	83	198	865	1268	1428	1830	5362	758
L1	LF	151	213	772	1504	1523	1941	4804	884
L10	LF	113	178	363	3251	1861	1049	4206	771
L11	LF	160	254	962	784	1613	1913	5231	875
L12	LF	177	254	733	834	1567	2158	5317	752
L13	LF	148	162	716	789	1514	2043	5726	694
L14	LF	187	234	839	907	1792	2358	4705	770
L15	LF	143	186	910	810	1630	2055	5211	847
L2	LF	137	213	928	636	1270	2302	5301	1005
L3	LF	139	143	725	689	1436	1889	6033	738
L4	LF	128	173	1114	961	1290	1882	5372	872
L5	LF	107	135	873	1561	1413	1859	5107	737
L6	LF	163	195	747	1132	1761	2289	4712	793
L7	LF	187	197	838	724	1594	2066	5306	880
L8	LF	153	174	849	790	1535	2231	5373	687
L9	LF	184	154	1044	907	1548	1855	5381	719
Y1	SF	73	131	644	1254	2081	1250	5897	462
Y10	SF	91	153	373	1714	1782	1266	5718	695
Y11	SF	90	146	522	2000	1540	1296	5742	456
Y12	SF	102	136	629	1318	1773	1236	6005	593
Y13	SF	102	165	510	1351	1066	1669	6376	553
Y14	SF	133	187	500	1207	935	1254	7098	478
Y15	SF	107	122	686	936	1588	1838	5995	520
Y2	SF	117	144	614	1193	1656	1311	6296	461
Y3	SF	117	166	679	785	1725	1527	6333	460
Y4	SF	116	138	526	1038	1259	1346	6830	539
Y5	SF	164	171	654	785	1241	1782	6490	505
Y6	SF	120	115	583	1058	1209	1526	6646	535
Y7	SF	125	151	706	787	1226	1861	6194	742
Y8	SF	125	219	801	2260	1490	1510	4798	589
Y9	SF	98	110	1003	2087	1780	1143	5021	550
Z1	PF	186	165	851	535	1535	2304	5401	815
Z10	PF	195	179	837	464	1712	2445	5211	749
Z11	PF	152	201	648	1625	2001	2544	3878	743
Z12	PF	236	185	739	896	2059	2489	4470	718
Z13	PF	238	195	721	448	2053	2293	4986	858
Z14	PF	183	247	668	367	2348	2379	4924	676
Z15	PF	182	203	732	367	1853	2742	5010	703
Z2	PF	155	138	798	446	1595	2262	5596	802
Z3	PF	177	142	788	387	1646	2498	5347	807
Z4	PF	124	156	826	536	1821	2309	5345	675
Z5	PF	175	132	811	587	1612	2308	5328	839
Z6	PF	220	132	866	554	1738	2343	5172	767
Z7	PF	131	158	805	742	1594	2454	5257	651
Z8	PF	205	153	808	504	1635	2374	5346	767
Z9	PF	166	143	624	498	1539	2137	5952	733
Kruskal‒Wallis Test	Test Statistic	29.389	22.361	14.188	22.81	27.656	44.229	19.446
	p	< 0.001	< 0.001	0.003	< 0.001	< 0.001	< 0.001	< 0.001

## Sheet: Table S2
Table S2. Abundance and Kruskal‒Wallis tests of bacterial classes in four vegetation types in the Saihanba region.
Sample Label	Vegetation	Polyangia	Alphaproteobacteria	Holophagae	Gammaproteobacteria	Methylomirabilia	Betaproteobacteria	Bacilli	Vicinamibacteria	Thermoleophilia	Others
C1	GL	137	171	118	534	632	591	1042	1480	5919	1168
C10	GL	75	148	203	340	586	546	2925	1260	4469	1240
C11	GL	90	71	140	330	286	573	6100	1078	2130	994
C12	GL	100	148	157	420	986	710	393	1382	6081	1415
C13	GL	122	95	147	432	1059	758	1361	1419	4971	1428
C14	GL	164	154	159	431	561	802	615	1842	5601	1463
C15	GL	137	171	188	393	634	526	614	1211	6196	1722
C2	GL	104	105	179	453	823	521	1641	1329	5396	1241
C3	GL	156	118	131	333	557	694	2296	1363	5033	1111
C4	GL	115	126	131	489	1038	834	555	1586	5604	1314
C5	GL	101	141	97	423	1034	627	722	1354	5954	1339
C6	GL	118	118	133	537	694	579	794	1284	6265	1270
C7	GL	199	131	112	438	753	678	966	1561	5631	1323
C8	GL	128	164	163	460	826	603	766	1249	5990	1443
C9	GL	106	127	154	474	865	827	1235	1518	5191	1295
L1	LF	135	178	239	413	772	932	1450	1531	4682	1460
L10	LF	178	194	139	514	363	1153	3229	767	4113	1142
L11	LF	179	150	196	474	962	989	778	1613	5142	1309
L12	LF	224	187	178	496	733	884	818	1835	5182	1255
L13	LF	124	140	231	511	716	863	747	1695	5582	1183
L14	LF	194	222	245	510	839	1060	874	1928	4569	1351
L15	LF	140	226	153	563	910	841	759	1752	5041	1407
L2	LF	124	163	220	370	928	737	630	1943	5209	1468
L3	LF	89	206	202	471	725	759	689	1607	5845	1199
L4	LF	75	203	230	401	1114	686	949	1492	5200	1442
L5	LF	114	167	228	437	873	809	1556	1515	4879	1214
L6	LF	191	112	211	675	747	974	1118	1912	4599	1253
L7	LF	131	175	176	467	838	952	718	1761	5108	1466
L8	LF	115	221	164	565	849	749	790	1946	5247	1146
L9	LF	131	157	213	504	1044	887	851	1503	5284	1218
Y1	SF	85	83	62	933	644	1065	1254	1086	5787	793
Y10	SF	125	211	33	1041	373	530	1684	1163	5565	1067
Y11	SF	94	141	16	615	522	784	1943	1147	5626	904
Y12	SF	101	70	50	1132	629	571	1294	1099	5885	961
Y13	SF	90	160	30	274	510	632	1295	1550	6181	1070
Y14	SF	107	147	73	290	500	498	1168	1088	7013	908
Y15	SF	77	144	125	557	686	887	904	1601	5870	941
Y2	SF	119	166	92	866	614	624	1172	1088	6181	870
Y3	SF	113	73	84	905	679	747	780	1375	6272	764
Y4	SF	73	127	104	359	526	773	1011	1133	6668	1018
Y5	SF	108	86	126	442	654	713	752	1543	6374	994
Y6	SF	54	85	121	552	583	572	1047	1283	6540	955
Y7	SF	106	142	115	391	706	693	774	1622	6050	1193
Y8	SF	153	46	125	836	801	608	2247	1312	4749	915
Y9	SF	67	135	55	780	1003	865	2070	986	4933	898
Z1	PF	99	151	188	396	851	988	509	1984	5230	1396
Z10	PF	136	103	173	544	837	1065	460	2132	5101	1241
Z11	PF	102	116	142	488	648	1397	1620	2304	3783	1192
Z12	PF	95	118	165	537	739	1404	894	2208	4334	1298
Z13	PF	118	100	118	553	721	1400	437	2029	4867	1449
Z14	PF	190	129	133	579	668	1640	366	2096	4825	1166
Z15	PF	104	152	144	491	732	1210	364	2446	4869	1280
Z2	PF	114	129	141	396	798	1070	446	1986	5455	1257
Z3	PF	124	192	114	435	788	1019	376	2177	5243	1324
Z4	PF	112	136	201	582	826	1103	531	2006	5252	1043
Z5	PF	94	186	228	445	811	981	581	1907	5152	1407
Z6	PF	98	103	166	488	866	1147	539	2072	5038	1275
Z7	PF	123	81	180	481	805	1032	738	2126	5162	1064
Z8	PF	98	109	142	502	808	1024	499	2102	5211	1297
Z9	PF	110	125	172	476	624	938	498	1846	5856	1147
Kruskal‒Wallis Test	Test Statistic	13.056	18.149	38.106	9.388	14.188	38.652	22.746	40.808	19.9
	p	0.005	< 0.001	< 0.001	0.025	0.003	< 0.001	< 0.001	< 0.001	< 0.001

## Sheet: Table S3
Table S3. Abundance and Kruskal‒Wallis tests of bacterial orders in four vegetation types in the Saihanba region.
Sample Label	Vegetation	Rhizobiales	Gaiellales	Rokubacteriales	Burkholderiales	Bacillales	Vicinamibacterales	Solirubrobacterales	Others
C1	GL	156	465	632	591	990	1479	5127	2352
C10	GL	138	345	586	546	2865	1260	3900	2152
C11	GL	64	204	286	573	6013	1078	1834	1740
C12	GL	131	467	986	710	254	1382	5352	2510
C13	GL	81	387	1059	758	1270	1419	4319	2499
C14	GL	145	419	561	802	497	1842	4937	2589
C15	GL	147	468	634	526	476	1211	5480	2850
C2	GL	98	434	823	521	1574	1328	4625	2389
C3	GL	109	285	557	694	2228	1363	4570	1986
C4	GL	117	367	1038	834	422	1584	4986	2444
C5	GL	117	501	1034	627	513	1354	5163	2483
C6	GL	106	517	694	579	598	1284	5493	2521
C7	GL	120	413	753	678	855	1561	4970	2442
C8	GL	158	470	826	603	684	1249	5255	2547
C9	GL	108	394	865	827	1134	1518	4529	2417
L1	LF	174	940	772	932	1295	1531	3573	2575
L10	LF	185	586	363	1153	3143	767	3363	2232
L11	LF	147	1054	962	989	698	1613	3830	2499
L12	LF	180	1018	733	884	727	1835	3980	2435
L13	LF	116	773	716	863	668	1695	4472	2489
L14	LF	202	853	839	1060	774	1928	3499	2637
L15	LF	215	908	910	841	692	1752	3840	2634
L2	LF	159	924	928	737	587	1943	3995	2519
L3	LF	195	827	725	759	590	1607	4663	2426
L4	LF	184	845	1114	686	853	1492	3982	2636
L5	LF	161	799	873	809	1423	1515	3789	2423
L6	LF	102	723	747	974	937	1912	3691	2706
L7	LF	163	880	838	952	550	1761	4044	2604
L8	LF	221	980	849	749	652	1946	3983	2412
L9	LF	149	1025	1044	887	766	1503	4003	2415
Y1	SF	78	722	644	1065	1021	1086	4913	2263
Y10	SF	191	593	373	530	1545	1163	4858	2539
Y11	SF	127	799	522	784	1853	1147	4722	1838
Y12	SF	58	725	629	571	1173	1096	4983	2557
Y13	SF	145	429	510	632	1237	1550	5581	1708
Y14	SF	141	865	500	498	1144	1088	5954	1602
Y15	SF	131	436	686	887	835	1601	5231	1985
Y2	SF	158	1018	614	624	1069	1088	5012	2209
Y3	SF	48	903	679	747	736	1375	5143	2161
Y4	SF	124	935	526	773	927	1133	5434	1940
Y5	SF	72	601	654	713	695	1543	5535	1979
Y6	SF	85	551	583	572	961	1283	5733	2024
Y7	SF	137	802	706	693	652	1622	4963	2217
Y8	SF	34	959	801	608	2146	1312	3603	2329
Y9	SF	124	757	1003	865	2000	986	3995	2062
Z1	PF	131	711	851	988	433	1984	4098	2596
Z10	PF	93	647	837	1065	421	2132	3987	2610
Z11	PF	105	660	648	1397	1570	2304	2765	2343
Z12	PF	115	628	739	1404	850	2208	3370	2478
Z13	PF	86	585	721	1400	380	2029	3938	2653
Z14	PF	112	446	668	1640	324	2093	4119	2390
Z15	PF	138	578	732	1210	313	2446	3904	2471
Z2	PF	119	559	798	1070	383	1986	4542	2335
Z3	PF	179	617	788	1019	282	2177	4228	2502
Z4	PF	120	925	826	1103	445	2006	4036	2331
Z5	PF	150	939	811	981	524	1907	3779	2701
Z6	PF	82	828	866	1147	504	2072	3843	2450
Z7	PF	70	768	805	1032	683	2126	4043	2265
Z8	PF	92	766	808	1024	437	2102	4019	2544
Z9	PF	115	737	624	938	429	1846	4691	2412
Kruskal‒Wallis Test	Test Statistic	19.841	35.663	14.188	38.652	20.299	40.808	28.224
	p	< 0.001	< 0.001	0.003	< 0.001	< 0.001	< 0.001	< 0.001

## Sheet: Table S4
Table S4. Abundance and Kruskal‒Wallis tests of bacterial families in four vegetation types in the Saihanba region.
Sample Label	Vegetation	Planococcaceae	Nitrosomonadaceae	Vicinamibacteraceae	Gaiellaceae	Oxalobacteraceae	Rokubacteriales	Bacillaceae	Solirubrobacteraceae	Others
C1	GL	131	146	266	215	244	569	839	5096	4286
C10	GL	568	124	319	143	200	504	2288	3876	3770
C11	GL	1085	102	123	61	216	266	4850	1828	3261
C12	GL	31	148	252	207	334	893	218	5332	4377
C13	GL	271	169	236	145	357	993	994	4288	4339
C14	GL	51	297	363	119	260	502	421	4889	4890
C15	GL	34	170	242	151	157	579	433	5444	4582
C2	GL	262	160	171	210	190	713	1307	4625	4154
C3	GL	417	207	237	132	343	507	1803	4539	3607
C4	GL	20	215	346	161	409	929	392	4973	4347
C5	GL	47	133	279	209	324	920	450	5136	4294
C6	GL	79	131	288	215	247	628	515	5471	4218
C7	GL	160	239	344	203	246	665	684	4932	4319
C8	GL	128	165	285	249	243	748	543	5220	4211
C9	GL	655	205	388	180	375	741	472	4494	4282
L1	LF	92	192	149	596	476	634	1201	3558	4894
L10	LF	2590	222	38	358	626	314	545	3350	3749
L11	LF	63	214	147	652	500	762	628	3795	5031
L12	LF	50	284	183	555	415	613	667	3954	5071
L13	LF	138	208	166	483	418	602	530	4464	4783
L14	LF	42	337	198	532	451	639	732	3487	5374
L15	LF	57	200	213	551	403	767	635	3822	5144
L2	LF	55	117	262	538	386	737	507	3994	5196
L3	LF	52	190	289	396	377	628	533	4615	4712
L4	LF	47	105	178	520	376	927	778	3957	4904
L5	LF	211	195	196	450	394	742	1195	3780	4629
L6	LF	60	355	245	423	368	623	873	3655	5190
L7	LF	26	238	180	543	449	617	513	4018	5208
L8	LF	77	229	247	566	255	667	573	3977	5201
L9	LF	44	153	171	629	467	812	713	4003	4800
Y1	SF	106	152	127	357	364	635	912	4913	4226
Y10	SF	145	77	177	260	157	359	1397	4845	4375
Y11	SF	119	276	109	391	207	522	1717	4717	3734
Y12	SF	97	105	107	334	260	611	1058	4964	4256
Y13	SF	86	174	241	195	256	502	1136	5581	3621
Y14	SF	73	92	151	442	208	484	1071	5942	3329
Y15	SF	63	154	283	193	284	656	772	5224	4163
Y2	SF	53	101	52	563	264	590	1009	4986	4174
Y3	SF	43	112	126	506	374	631	685	5127	4188
Y4	SF	45	185	165	560	351	495	879	5429	3683
Y5	SF	63	254	287	364	298	623	632	5514	3757
Y6	SF	268	181	208	285	235	554	684	5727	3650
Y7	SF	43	138	207	468	344	642	594	4928	4428
Y8	SF	222	108	158	492	198	756	1913	3572	4373
Y9	SF	225	161	121	441	354	997	1772	3956	3765
Z1	PF	41	338	344	353	441	768	378	4079	5050
Z10	PF	42	332	444	391	473	782	373	3971	4984
Z11	PF	1023	438	298	415	620	603	528	2759	5108
Z12	PF	443	405	301	375	605	692	404	3343	5224
Z13	PF	21	404	379	265	572	681	341	3907	5222
Z14	PF	24	466	331	157	679	639	289	4100	5107
Z15	PF	27	340	397	291	588	697	277	3881	5294
Z2	PF	98	289	460	286	454	743	277	4522	4663
Z3	PF	62	330	407	370	433	723	213	4228	5026
Z4	PF	170	328	265	559	474	795	271	4010	4920
Z5	PF	73	258	330	546	459	733	448	3766	5179
Z6	PF	36	283	368	493	600	785	456	3832	4939
Z7	PF	82	271	363	442	423	766	599	4023	4823
Z8	PF	77	275	442	475	495	759	354	4001	4914
Z9	PF	47	273	423	441	439	588	382	4664	4535
Kruskal‒Wallis Test	Test Statistic	4.055	32.378	36.678	36.077	42.288	8.252	30.244	27.771
	p	0.256	< 0.001	< 0.001	< 0.001	< 0.001	0.041	< 0.001	< 0.001

## Sheet: Table S5
Table S5. Abundance and Kruskal‒Wallis tests of bacterial genera in four vegetation types in the Saihanba region.
Sample Label	Vegetation	Acidibacter	Vicinamibacter	Massilia	Gaiella	Rokubacteriales	Bacillus	Conexibacter	Solirubrobacter	Others
C1	GL	90	185	159	215	569	766	952	4101	4755
C10	GL	48	227	123	143	504	1896	605	3163	5083
C11	GL	50	70	148	61	266	4779	289	1453	4676
C12	GL	60	186	257	207	893	195	846	4329	4819
C13	GL	69	176	282	145	993	944	752	3256	5175
C14	GL	78	223	151	119	502	324	797	3859	5739
C15	GL	76	196	121	151	579	427	944	4285	5013
C2	GL	43	132	157	210	713	1265	786	3689	4797
C3	GL	95	152	262	132	507	1768	823	3600	4453
C4	GL	83	252	345	161	929	355	689	4133	4845
C5	GL	81	219	263	209	920	420	864	4154	4662
C6	GL	63	177	186	215	628	508	897	4389	4729
C7	GL	65	256	143	203	665	676	764	4074	4946
C8	GL	84	188	179	249	748	523	875	4209	4737
C9	GL	66	275	290	180	741	420	677	3655	5488
L1	LF	126	116	384	596	634	1166	704	2548	5518
L10	LF	46	16	475	358	314	518	729	2515	6821
L11	LF	113	134	433	652	762	600	732	2759	5607
L12	LF	119	178	296	555	613	628	946	2812	5645
L13	LF	91	151	369	483	602	445	953	3344	5354
L14	LF	94	156	361	532	639	730	737	2513	6030
L15	LF	96	192	324	551	767	600	788	2820	5654
L2	LF	70	191	315	538	737	488	718	3167	5568
L3	LF	95	249	303	396	628	495	1086	3302	5238
L4	LF	76	122	336	520	927	764	848	2864	5335
L5	LF	76	154	321	450	742	1169	721	2874	5285
L6	LF	94	199	277	423	623	794	859	2581	5942
L7	LF	83	151	381	543	617	478	1091	2786	5662
L8	LF	57	214	192	566	667	555	880	2971	5690
L9	LF	89	144	430	629	812	677	1033	2782	5196
Y1	SF	489	84	201	357	635	900	835	3249	5042
Y10	SF	689	54	85	260	359	1377	932	3710	4326
Y11	SF	328	92	157	391	522	1712	1194	2842	4554
Y12	SF	883	50	204	334	611	1040	981	3641	4048
Y13	SF	90	140	136	195	502	1129	1127	4209	4264
Y14	SF	95	114	130	442	484	1069	1398	4246	3814
Y15	SF	213	202	150	193	656	733	824	4004	4817
Y2	SF	566	37	185	563	590	985	903	3107	4856
Y3	SF	318	96	306	506	631	650	971	3825	4489
Y4	SF	72	89	284	560	495	861	1289	3754	4388
Y5	SF	137	205	201	364	623	600	877	4480	4305
Y6	SF	172	147	143	285	554	666	1161	4339	4325
Y7	SF	94	142	238	468	642	580	946	3698	4984
Y8	SF	628	114	136	492	756	1877	691	2509	4589
Y9	SF	456	69	201	441	997	1765	798	2742	4323
Z1	PF	74	276	319	353	768	318	589	3251	5844
Z10	PF	96	358	326	391	782	282	593	3184	5780
Z11	PF	109	209	435	415	603	466	553	1945	7057
Z12	PF	125	210	410	375	692	362	592	2358	6668
Z13	PF	81	249	325	265	681	310	439	3252	6190
Z14	PF	124	217	452	157	639	224	513	3355	6111
Z15	PF	87	310	388	291	697	223	508	3225	6063
Z2	PF	82	346	294	286	743	199	690	3671	5481
Z3	PF	69	315	291	370	723	168	680	3426	5750
Z4	PF	165	214	366	559	795	233	596	2830	6034
Z5	PF	99	258	335	546	733	348	658	2844	5971
Z6	PF	88	279	448	493	785	402	655	2882	5760
Z7	PF	153	262	286	442	766	503	744	2959	5677
Z8	PF	93	350	338	475	759	265	632	3232	5648
Z9	PF	107	293	320	441	588	347	639	3835	5222
Kruskal‒Wallis Test	Test Statistic	28.375	36.586	37.19	36.077	8.252	31.482	33.583	22.663
	p	< 0.001	< 0.001	< 0.001	< 0.001	0.041	< 0.001	< 0.001	< 0.001
